# Supplementary material
Source: PubMed Central journal article supplement (PMC2860783)

## Supplementary Materials

### 3C-study

Dementia was diagnosed using a three-step procedure (1). Trained psychologists administered a battery of neuropsychological tests. Next, all the participants in Bordeaux and Montpellier were examined by a neurologist at baseline, whereas in Dijon, only those who screened positive for dementia underwent further examination (because of the large number of participants in that centre). During follow-up, participants with suspected incident dementia (on the basis of their neuropsychological test results) were examined by a neurologist. Lastly, an independent committee of neurologists reviewed all potential prevalent and incident cases of dementia in order to validate the diagnosis, according to the criteria given in the *Diagnostic and Statistical Manual of Mental Disorders*, fourth edition (DSM-IV). Dementia classification was based on the National Institute of Neurological and Communication Disorders and Stroke/Alzheimer's Disease and Related Disorders Association criteria for AD and the National Institute of Neurologic Disorders and Stroke/Association Internationale pour la Recherche et l'Enseignement en Neurosciences criteria for vascular dementia (2, 3). Subjects with a typical history of AD (progressive worsening of memory or other cognitive functions) and documented stroke were classified as having mixed dementia.

Age, gender, centre, educational level, hypertension, body mass index (BMI), diabetes, history of vascular disease and apolipoprotein E (APOE) genotype were systematically used as adjusting factors. Educational level was defined as a six-level variable: no school attendance, primary education without a diploma, primary education with a diploma, secondary education without a baccalaureate degree, secondary education with a baccalaureate degree and a university-level degree. Body-mass Index was defined according to the Quetelet equation. Hypertension was defined as a systolic blood pressure  $\geq 140$  mm Hg or diastolic blood pressure  $\geq 90$  mm Hg or administration of antihypertensives. Subjects were considered as suffering from type 2 diabetes if the fasting glycemia was  $\geq 126$  mg/dL or if they used anti-diabetic treatments. A history of vascular disease was defined as a self-reported history of myocardial infarction, angina pectoris, arteritis and/or stroke.

To limit genetic heterogeneity, subjects whose mother language was not French and those born abroad were removed from the study (n=1181). Individuals for whom information on their dementia status during the 4-year follow-up was missing were withdrawn (n=854; refusal or lost to follow-up and death), together with individuals for whom at least one IL33 or APOE genotyping result was missing (n=710). Baseline characteristics of the remaining population sample (n=6549) are reported in Table 1. Three hundred and fifty individuals were demented, with 143 prevalent cases (91 cases of AD, 39 cases of mixed/vascular dementia, 3 cases of Parkinsonian dementia and 10 cases of other types of dementia) and 207 incident cases (135 cases of AD, 40 cases of mixed/vascular dementia, 15 cases of Parkinsonian dementia and 17 cases of other types of dementia).

### *Brain samples*

AD brains were obtained at autopsy from 114 patients with early- and late-onset sporadic AD accessioned from the Greater Manchester region of United Kingdom during years 1986-2001 (mean age at death =  $73.1 \pm 9.1$  years old; mean age at onset =  $65.9 \pm 10.3$  years old; 51% male) (4). All patients were of Caucasian ethnic origin. Pathological diagnoses were made in accordance with CERAD Neuropathological Criteria for AD. All patients were at Braak stages 5 or 6 at time of death. The proportion of tissue area occupied by  $A\beta_{40}$  and  $A\beta_{42}$  was quantified in immunohistochemically stained section from Brodmann area 8/9 of the frontal cortex, as previously reported. The extent of cerebral amyloid angiopathy (CAA) in leptomeningeal and intraparenchymal arteries was rated semiquantitatively in 91/114 patients (80%). The severity of CAA was assessed semi-quantitatively on a five –point scale (grades 0-4). Briefly, CAA was rated according to: 0 = no blood vessels (small arteries, arterioles and capillaries) are stained; 1= a few leptomeningeal vessels only involved; 2 = a few leptomeningeal vessels only were affected, mild intracortical vascular involvement; 3 = many leptomeningeal and intracortical vessels affected; 4 = many leptomeningeal and intracortical vessels affected with dyschoric angiopathy associated with intracortical vessels.

Control brains were obtained from an initial set of 167 brains recruited from routine autopsies carried out at the Hospices Civils de Strasbourg (France) (5). Recruitment was designed to exclude cases of dementia (individuals were not recruited from medical institutions where the majority of patients presented with dementia, but from a general hospital). Most subjects were admitted less than 48 hours before death via emergency services and were living at home prior to their admission. Cases referred to autopsy for neurological pathologies were excluded. The neuropathological diagnosis for Alzheimer's disease followed CERAD Neuropathological criteria. In addition, Braak stages were assessed in the whole series. Again, all control subjects were Caucasian.

### *SNPs densification in IL-33, genotyping and SNPs selection*

Besides the 4 Tag-SNPs selected using the HapMap website, thirteen SNPs (frequency>10%) were randomly selected along the gene using NCBI website and dHPLC results. All exons, intron/exon boundaries and proximal promoter of the *IL-33* gene were screened in 24 AD cases from the French population for sequence variation using denaturing high-performance liquid chromatography (dHPLC) in Table S2 (supplemental material). All variants identified by dHPLC were confirmed by sequencing. When already referenced, the name of the SNP was indicated in Table S2 (supplemental material).

Eleven SNPs were randomly selected across the *IL-33* gene and correlation coefficients ( $r^2$ ) between all the SNPs were estimated in the French control sub-population using the Haploview software (supplemental material, Figure S1). In addition of the 4 tag-SNPs previously analysed in the Affymetrix GeneChip, 8 SNPs were finally selected ( $r^2 < 0.8$ ). These 8 SNPs were then genotyped in the French and American sub-populations.

Genotyping of rs1157505 (SNP3), rs1891385 (SNP4), rs10975511 (SNP9), rs7035413 (SNP10), rs11792633 (SNP11), rs7044343 (SNP12), rs1048274 (SNP13), rs8172 (SNP14) were realised by enzymatic digestion following PCR amplification as referenced in Table S3 (supplementary material). Genotyping of rs992969 (SNP1), rs7848215 (SNP2), rs16924144 (SNP5), rs96029 (SNP6), rs16924159 (SNP7), rs16924161 (SNP8), rs10815398 (SNP15) were determined by TaqMan assays using the Biosystems Prism 7900HT system as described by the supplier (supplementary material, Table S16).

For extension of the rs1157505, rs11792633 and rs7044343 analyses in the different case-control populations, the three SNPs were independently genotyped in Lille (complete French and UK populations), in Pittsburgh (complete American case-control study). The two French and American sub-populations were genotyped twice using two different technologies and 6 genotype discordances were observed. The corresponding individuals were removed from the analyses.

In the 3C-study, the rs1157505, rs11792633 and rs7044343 polymorphisms were genotyped using KASPar assays, as described by the supplier (Kbiosciences, Hoddesdon, UK). APOE genotyping was performed using a fluorogenic 5'-nuclease assay with TaqMan chemistry, as previously described (1).

### *Immunohistochemistry*

Brain tissue from the temporal anterior cortex (Brodmann area 38) from nine Alzheimer patients and twelve controls was investigated. Rehydrated, 5  $\mu$ m thick sections of formalin-fixed, paraffin-embedded brain tissue were heated in a pressure cooker, in pH 6.0 citrate buffer, prior to labelling. The IL-33 immunostaining was performed according to manufacturers' instructions (IL-33 monoclonal antibody IL33305B from Alexis Biochemicals, Vectastain Elite ABC kit from Vector laboratories, diaminobenzidin as chromogen). Positive controls of the staining steps were human tonsils and the colon mucosa from a patient with Crohn's disease. In several cases, an additional slide was processed, replacing IL33 by non immune serum, showing any labelling as expected.

### *IL-33 mRNA quantification*

Total RNA was extracted from frozen frontal cortex brain tissue from the 114 AD and 167 control samples using phenol/chloroform protocol (Trizol® reagent, Invitrogen). The quality of total RNA was assessed using Agilent 2100 bionalyser and the ratio of ribosomal RNA 28S/18S systematically estimated using the Agilent 2100 bionalyser bio-sizing software. Total RNA samples from 45 controls and 43 AD cases were randomly selected for *IL33* quantification as described by the supplier

(QuantiGene®, Panomics) (6). The quantigene technology is well adapted to our purpose for several reasons: (i) this one allows for the direct quantification of a target mRNA without retro-transcription step and PCR amplification; (ii) it limits biases due to RNA degradation.

Briefly, capture and label extender probe sets specific for *IL-33* and *β-actin* mRNA (as furnished by the supplier) were combined and diluted to 100 fmol/μl in a lysis buffer supplied in the QuantiGene bDNA Signal Amplification Kit (Bayer Diagnostics, East Walpole, MA). Total RNA (0.8 μg for *IL33* and 0.2 μg for *β-actin* in a final volume of 10 μl) was added to each well of a 96-well plate with 40 μl of capture buffer, 40 μl of lysis buffer and 10 μl of each diluted probe set. RNA was allowed to hybridize for at least 16 h at 53°C. Plates were then washed at room temperature (600 μl of a wash buffer). Samples were then hybridized for 60 min at 46°C with the bDNA amplifier molecules (100 μl/well) diluted in a amplifier/label probe buffer (1:100). At room temperature, plates were then rinsed with the wash Buffer. Label probe (1:100 in a amplifier/label probe buffer) was added to each well (100 μl/well) and hybridized to the bDNA-RNA complex for 60 min at 46°C. Plates were again rinsed with wash buffer at room temperature. Alkaline phosphatase-mediated luminescence was triggered by the addition of a dioxetane substrate solution (100 μl /well). The enzymatic reaction was allowed to proceed for 30 min at 46°C, and luminescence was measured with the 1420 Victor light luminometer (Perkin Elmer).

#### *Immunofluorescence (IF)*

The SY5Y-APP<sup>WT</sup> and COS-7 cell line was cultured on poly l-Lys-coated glass coverslips (Chamber Slide System 2 wells (Lab-Tek; Nunc, Roskilde, Denmark)) for 24 hours. For IL-33 IF, cells were transfected with IL-33 cDNA. After 48 hours, cells were fixed in PBS containing 4% paraformaldehyde for 20 min at room temperature and further permeabilized with 0.25% (v/v) Triton X-100 in PBS. After blocking in 5% (w/v) bovine serum albumin (BSA), fixed materials were incubated for 1h30 at room temperature (for IL-33 IF) or overnight at 4°C (for ST2 IF) with primary antibodies 1/100 (respectively, PAb to IL-33 (human) (Alexis®, Apotech, Switzerland) or anti-ST2 (2A5)) in PBS added with 5% (w/v) BSA and 0.25% Triton X-100. After washing, secondary antibodies (respectively, anti-rabbit IgG-TRITC or anti-mouse IgG-TRITC (Santa Cruz Biotechnology, USA)) diluted to 1/400 was used. Coverslips were mounted to slides with Vectashield® with DAPI (Vector Laboratories, France). The microscopy platform of the Pasteur Institute of Lille was used for slide reading.

#### *Statistical analyses*

The SAS software release 8.02 was used for statistical analyses (SAS Institute, Cary, NC). The association of the 1,156 SNPs with the risk of AD was estimated by multiple logistic regression models, adjusted for age, gender, *APOE* status and centre. Three models were systematically analysed:

recessive, co-dominant and dominant. Following Bonferroni corrections, the significant *P*-value threshold was set at  $4.3 \times 10^{-5}$  (0.05/1,156).

In the case-control studies, we used Akaike Information Criterion (AIC) to determine the best-fitting genetic model (dominant, co-dominant or recessive) for rs1157505, rs11792633 and rs7044343 in *IL-33*. The model with the lowest AIC reflects the best balance of goodness-of-fit and parsimony (7, 8). We consequently coded the genotypes of the three polymorphism as a dummy variable according to the hypothesis of a dominant model, i.e., at least one minor allele. Before pooled analyses, homogeneity between populations was tested using Breslow-day computation (9). The association of the 3 SNPs with the risk of AD was then estimated by multiple logistic regression models, adjusted for age, gender, *APOE* status and centre when necessary. Interactions between *IL-33*, *APOE*, gender or age variables were tested in logistic regression models. Haplotypes were estimated using the Haploview software then the Thesias one for confirmation. Permutation tests (1,000) were performed to assess the strength of the observed association. The objective of the Thesias software is to perform haplotype-based association analysis in unrelated individuals. This program is based on the maximum likelihood model described in<sup>7</sup> and is linked to the SEM algorithm (10).

The association of rs1157505, rs11792633 and rs7044343 with age at onset was analysed using a general linear model adjusted for gender and centre following *APOE* stratification. Haplotype associations with age at onset were estimated using the Thesias software.

Comparison of *IL-33* mRNA amounts between AD cases and controls was performed using a non parametric Wilcoxon test. However, an analysis of covariance using a general linear model for comparison of *IL-33* mRNA amounts between AD cases and controls was also performed (mRNA level data was log transformed to normalize distributions) adjusted for mRNA degradation (evaluated using ratio of ribosomal RNA 28S/18S measured by the Agilent 2100 bionalyser and bio-sizing software). The results were not modified following this additional analysis (data not shown).

Association study of rs1157505, rs11792633 and rs7044343 with CAA score was performed using a non parametric Wilcoxon test.

## References

- 1 3C Study Group. Vascular factors and risk of dementia: design of the Three-City Study and baseline characteristics of the study population. *Neuroepidemiology* 2003; **22**: 316-25.
- 2 American Psychiatric Association. Diagnostic and statistical manual of mental disorders, 4th ed. Washington, DC: APA Press, 1994.
- 3 McKhann G, Drachman D, Folstein M, et al. Clinical diagnosis of Alzheimer's disease: report of the NINCDS-ADRDA Work Group under the auspices of Department of Health and Human Services Task Force on Alzheimer's disease. *Neurology* 1984; **34**: 939-944.

- 4 Tian, J., Shi, J., Smallman, R., Iwatsubo, T. and Mann, D.M. Relationships in Alzheimer's disease between the extent of Abeta deposition in cerebral blood vessel walls, as cerebral amyloid angiopathy, and the amount of cerebrovascular smooth muscle cells and collagen. *Neuropathol. Appl. Neurobiol.*, 2006; **32**: 332-340.
- 5 Berr, C., Lambert, J.C., Sazdovitch, V., Amouyel, P., Chartier-Harlin, M.C., Mohr, M., Heldt, N., Kiesmann, M. and Hauw, J.J. Neuropathological epidemiology of cerebral aging: a study of two genetic polymorphisms. *Neurobiol. Aging*, 2001; **22**: 227-235.
- 6 Canales, R.D., Luo, Y., Willey, J.C., Austermiller, B., Barbacioru, C.C., Boysen, C., Hunkapiller, K., Jensen, R.V., Knight, C.R., Lee, K.Y., *et al.* Evaluation of DNA microarray results with quantitative gene expression platforms. *Nat. Biotechnol.*, 2006; **24**: 1115-1122.
- 7 Akaike, H. A Bayesian analysis of the minimum AIC procedure. *Ann. Inst. Statist. Math.*, 1978; **30**: 9-14.
- 8 Bozdogan, H. Model-selection and Akaike's information criterion (AIC): The general theory and its analytical extensions. *Psychometrika*, 1987; **52**: 345-370.
- 9 Breslow, N.E., Day, N.E., Halvorsen, K.T., Prentice, R.L. and Sabai, C. Estimation of multiple relative risk functions in matched case-control studies. *Am. J. Epidemiol.*, 1978; **8**: 299-307.
- 10 Tregouet, D.A. and Tiret, L. Cox proportional Hazards survival regression in haplotype-based association analysis using the stochastic-EM algorithm. *Eur. J. Hum. Genet.*, 2004; **12**: 971-974.

**Table S1** SNPs exhibiting a significant association with the risk of developing AD using either a recessive or a dominant or a co-dominant model. *P*-value adjusted on age, gender and *APOE* status.

| SNP        | Chromosome | Gene      | 12+22<br>versus 11 | 22 versus<br>12+11 | Co-dominant<br>model |
|------------|------------|-----------|--------------------|--------------------|----------------------|
| rs153202   | 5          | MYO10     | 0.005              | ns                 | 0.01                 |
| rs27430    | 5          | MYO10     | 0.008              | 0.005              | 0.002                |
| rs2401987  | 5          | MYO10     | 0.05               | ns                 | ns                   |
| rs26315    | 5          | MYO10     | 0.05               | ns                 | ns                   |
| rs6881621  | 5          | MYO10     | ns                 | 0.04               | ns                   |
| rs1445946  | 5          | MYO10     | 0.009              | ns                 | 0.05                 |
| rs13356962 | 5          | MYO10     | ns                 | 0.01               | ns                   |
| rs250339   | 5          | MYO10     | 0.03               | ns                 | 0.04                 |
| rs10051929 | 5          | MYO10     | ns                 | ns                 | 0.03                 |
| rs12520877 | 5          | MYO10     | ns                 | ns                 | 0.04                 |
| rs4702173  | 5          | MYO10     | ns                 | 0.04               | ns                   |
| rs17651023 | 5          | MYO10     | 0.05               | ns                 | ns                   |
| rs6898592  | 5          | MYO10     | 0.01               | ns                 | ns                   |
| rs17707609 | 5          | MYO10     | ns                 | 0.007              | ns                   |
| rs17651165 | 5          | MYO10     | 0.007              | ns                 | ns                   |
| rs31505    | 5          | MYO10     | 0.02               | ns                 | 0.05                 |
| rs17614059 | 5          | MYO10     | 0.01               | ns                 | 0.02                 |
| rs17651266 | 5          | MYO10     | 0.05               | ns                 | 0.05                 |
| rs40985    | 5          | MYO10     | 0.007              | ns                 | 0.007                |
| rs716555   | 5          | MYO10     | Ns                 | 0.02               | 0.03                 |
| rs253315   | 5          | MYO10     | 0.009              | 0.02               | 0.002                |
| rs2560852  | 5          | MYO10     | 0.002              | ns                 | 0.001                |
| rs7710976  | 5          | MYO10     | 0.008              | ns                 | ns                   |
| rs153709   | 5          | MYO10     | ns                 | 0.04               | ns                   |
| rs716436   | 5          | ITGA2     | ns                 | 0.009              | ns                   |
| rs4865756  | 5          | ITGA2     | 0.02               | ns                 | 0.03                 |
| rs11741738 | 5          | ITGA2     | ns                 | 0.02               | ns                   |
| rs9467731  | 6          | NM_007047 | ns                 | 0.01               | ns                   |
| rs3757142  | 6          | NM_007047 | ns                 | 0.009              | ns                   |
| rs3130285  | 6          | TNXB      | 0.003              | ns                 | 0.009                |
| rs3130286  | 6          | TNXB      | 0.006              | ns                 | 0.01                 |
| rs185819   | 6          | TNXB      | ns                 | 0.03               | ns                   |
| rs3130287  | 6          | TNXB      | ns                 | 0.002              | 0.004                |
| rs3134943  | 6          | AGER      | ns                 | 0.005              | 0.007                |
| rs8365     | 6          | AGER      | 0.03               | ns                 | ns                   |
| rs3134940  | 6          | AGER      | 0.04               | ns                 | ns                   |
| rs1800684  | 6          | AGER      | 0.008              | ns                 | 0.01                 |
| rs3129876  | 6          | HLA-DRA   | ns                 | 0.008              | 0.009                |
| rs3129881  | 6          | HLA-DRA   | 0.03               | ns                 | 0.05                 |
| rs9268658  | 6          | HLA-DRA   | 0.05               | 0.01               | 0.008                |
| rs8084     | 6          | HLA-DRA   | ns                 | 0.009              | ns                   |
| rs7192     | 6          | HLA-DRA   | 0.004              | ns                 | 0.03                 |
| rs3116713  | 6          | NM_002636 | ns                 | ns                 | 0.04                 |
| rs442745   | 6          | NM_002636 | ns                 | 0.007              | 0.02                 |

|            |    |           |         |        |        |
|------------|----|-----------|---------|--------|--------|
| rs3106196  | 6  | NM_002636 | ns      | 0.05   | 0.03   |
| rs3218114  | 6  | CCND3     | ns      | 0.003  | 0.002  |
| rs9529     | 6  | CCND3     | 0.05    | ns     | ns     |
| rs3218086  | 6  | CCND3     | ns      | 0.03   | 0.02   |
| Rs7848215  | 9  | IL-33     | 0.01    | 0.02   | 0.004  |
| rs7044343  | 9  | IL-33     | 0.00003 | ns     | 0.0001 |
| rs10757145 | 9  | FLJ20375  | ns      | 0.05   | ns     |
| rs1332322  | 9  | FLJ20375  | ns      | ns     | 0.04   |
| rs4978111  | 9  | FLJ20375  | 0.02    | ns     | 0.01   |
| rs7860490  | 9  | FLJ20375  | ns      | 0.04   | 0.05   |
| rs7033259  | 9  | FLJ20375  | 0.05    | ns     | ns     |
| rs6475473  | 9  | FLJ20375  | 0.002   | 0.02   | 0.002  |
| rs6475474  | 9  | FLJ20375  | ns      | 0.02   | 0.01   |
| rs10811438 | 9  | FLJ20375  | ns      | ns     | 0.04   |
| rs10964779 | 9  | FLJ20375  | 0.03    | ns     | ns     |
| rs3780491  | 9  | NM_001497 | ns      | ns     | 0.03   |
| rs10511909 | 9  | NM_001497 | 0.01    | ns     | 0.008  |
| rs2774272  | 9  | NM_001497 | ns      | 0.05   | 0.02   |
| rs10758194 | 9  | NM_001497 | ns      | 0.04   | 0.02   |
| rs1328898  | 9  | NM_001497 | 0.05    | ns     | 0.02   |
| rs2274592  | 9  | CNTFR     | 0.04    | ns     | 0.02   |
| rs2381164  | 9  | CNTFR     | 0.008   | 0.02   | 0.002  |
| rs10972149 | 9  | CNTFR     | 0.0008  | ns     | 0.04   |
| rs10814123 | 9  | CNTFR     | ns      | 0.001  | 0.05   |
| rs10758268 | 9  | CNTFR     | ns      | 0.0003 | 0.001  |
| rs12551429 | 9  | CNTFR     | ns      | 0.05   | ns     |
| rs3763613  | 9  | CNTFR     | ns      | 0.03   | ns     |
| rs3829078  | 9  | CA9       | 0.01    | ns     | 0.01   |
| rs6481654  | 10 | KIAA1462  | 0.02    | ns     | ns     |
| rs9988732  | 10 | KIAA1462  | ns      | 0.003  | 0.01   |
| rs2488024  | 10 | KIAA1462  | 0.006   | ns     | 0.02   |
| rs11000780 | 10 | CAMK2G    | ns      | 0.05   | ns     |
| rs10824037 | 10 | CAMK2G    | ns      | 0.05   | ns     |
| rs10458656 | 10 | CAMK2G    | 0.05    | ns     | ns     |
| rs2633310  | 10 | CAMK2G    | 0.02    | ns     | 0.02   |
| rs2675662  | 10 | CAMK2G    | ns      | 0.02   | 0.02   |
| rs2459446  | 10 | CAMK2G    | 0.01    | ns     | 0.02   |
| rs2688614  | 10 | CAMK2G    | ns      | 0.007  | 0.005  |
| rs6055551  | 20 | ANGPT4    | ns      | 0.04   | ns     |
| rs3787566  | 20 | ANGPT4    | ns      | 0.007  | ns     |
| rs4816050  | 20 | ANGPT4    | ns      | 0.002  | ns     |
| rs13040505 | 20 | ANGPT4    | 0.02    | ns     | 0.01   |
| rs730169   | 20 | ANGPT4    | ns      | 0.03   | 0.04   |
| rs574628   | 20 | ANGPT4    | 0.04    | ns     | ns     |
| rs1741296  | 20 | HSPA12B   | ns      | 0.004  | 0.03   |
| rs6076623  | 20 | HSPA12B   | 0.01    | ns     | 0.04   |



**Table S2** Primer set used for the characterization of *IL33* polymorphisms by dHPLC.

| <b>Name</b>    |         | <b>Primer</b>               | <b>SNP detected</b> |
|----------------|---------|-----------------------------|---------------------|
| <i>IL33-1</i>  | Forward | 5'-aagtcacccttctaattctt-3'  | no mutation         |
|                | Reverse | 5'-agagatcagtgattcttcc-3'   |                     |
| <i>IL33-2</i>  | Forward | 5'-attactgataggccaagg-3'    | no mutation         |
|                | Reverse | 5'-ccatggtccaagttta-3'      |                     |
| <i>IL33-3</i>  | Forward | 5'-ctagcatgaatgcatagta-3'   | no mutation         |
|                | Reverse | 5'-agcatgtataaacattggag-3'  |                     |
| <i>IL33-4</i>  | Forward | 5'-tgataagatactgtgaacct-3'  | no mutation         |
|                | Reverse | 5'-gcatatttagatgtgtaag-3'   |                     |
| <i>IL33-5</i>  | Forward | 5'-caatcactactctcagcaag-3'  | no mutation         |
|                | Reverse | 5'-gcagaagttctggtacaca-3'   |                     |
| <i>IL33-6</i>  | Forward | 5'-ttaatctagccaacagtgac-3'  | no mutation         |
|                | Reverse | 5'-ctgtttgccatgtctaagt-3'   |                     |
| <i>IL33-7</i>  | Forward | 5'-ttcatcagagcatattcgtg-3'  | rs10975519          |
|                | Reverse | 5'-tcctctgagaatctaagggt-3'  | rs10975520          |
| <i>IL33-8</i>  | Forward | 5'-aagatacctgtagtgaatg-3'   | no mutation         |
|                | Reverse | 5'-gtagtaagtgattgtgcttt-3'  |                     |
| <i>IL33-9</i>  | Forward | 5'-tccacaactcaactaagcaag-3' | no mutation         |
|                | Reverse | 5'-agatgcagttatacagagg-3'   |                     |
| <i>IL33-10</i> | Forward | 5'-cttagcatgttggaatgtt-3'   | rs1048274           |
|                | Reverse | 5'-catttatgttacctggcttg-3'  | rs1200491           |
| <i>IL33-11</i> | Forward | 5'-actcagagcagatccctt-3'    | no mutation         |
|                | Reverse | 5'-cagtgttatcaggaagctgg-3'  |                     |
| <i>IL33-12</i> | Forward | 5'-gggcaaagttgcttctaatt-3'  | no mutation         |

**Table S3** Genotypic and allelic distribution of the *IL33* SNPs studied in American and French sub-populations.

| Tag-SNP            | SNP        |          | American sub-population             |          |       |          |          |                                   |          |       |          |       | French sub-population               |       |          |       |          |                                   |       |          |       |       |       |       |
|--------------------|------------|----------|-------------------------------------|----------|-------|----------|----------|-----------------------------------|----------|-------|----------|-------|-------------------------------------|-------|----------|-------|----------|-----------------------------------|-------|----------|-------|-------|-------|-------|
|                    |            |          | Genotypic distribution <sup>a</sup> |          |       |          |          | Allelic distribution <sup>a</sup> |          |       |          |       | Genotypic distribution <sup>a</sup> |       |          |       |          | Allelic distribution <sup>a</sup> |       |          |       |       |       |       |
|                    |            |          | 11                                  | 12       | 22    | Total    | 1        | 2                                 | 11       | 12    | 22       | Total | 1                                   | 2     | 11       | 12    | 22       | Total                             | 1     | 2        |       |       |       |       |
| <i>n</i>           | freq       | <i>n</i> | freq                                | <i>n</i> | freq  | <i>n</i> | <i>n</i> | freq                              | <i>n</i> | freq  | <i>n</i> | freq  | <i>n</i>                            | freq  | <i>n</i> | freq  | <i>n</i> | <i>n</i>                          | freq  | <i>n</i> | freq  |       |       |       |
| Tag-SNP            | rs7848215  | controls | 114                                 | 0.582    | 70    | 0.357    | 12       | 0.061                             | 196      | 298   | 0.760    | 94    | 0.240                               | 119   | 0.548    | 86    | 0.396    | 12                                | 0.055 | 217      | 324   | 0.747 | 110   | 0.253 |
|                    |            | cases    | 98                                  | 0.500    | 82    | 0.418    | 16       | 0.082                             | 196      | 278   | 0.709    | 114   | 0.291                               | 129   | 0.469    | 119   | 0.433    | 27                                | 0.098 | 275      | 377   | 0.685 | 173   | 0.315 |
|                    | rs16924144 | controls | 78                                  | 0.406    | 86    | 0.448    | 28       | 0.146                             | 192      | 242   | 0.630    | 142   | 0.370                               | 95    | 0.426    | 98    | 0.439    | 30                                | 0.135 | 223      | 288   | 0.646 | 158   | 0.354 |
|                    |            | cases    | 83                                  | 0.428    | 89    | 0.459    | 22       | 0.113                             | 194      | 255   | 0.657    | 133   | 0.343                               | 133   | 0.478    | 118   | 0.424    | 27                                | 0.097 | 278      | 384   | 0.691 | 172   | 0.309 |
|                    | rs16924159 | controls | 77                                  | 0.391    | 93    | 0.472    | 27       | 0.137                             | 197      | 247   | 0.627    | 147   | 0.373                               | 101   | 0.472    | 92    | 0.430    | 21                                | 0.098 | 214      | 294   | 0.687 | 134   | 0.313 |
|                    |            | cases    | 89                                  | 0.452    | 86    | 0.437    | 22       | 0.112                             | 197      | 264   | 0.670    | 130   | 0.330                               | 139   | 0.513    | 107   | 0.395    | 25                                | 0.092 | 271      | 385   | 0.710 | 157   | 0.290 |
| rs7044343          | controls   | 71       | 0.360                               | 100      | 0.508 | 26       | 0.132    | 197                               | 242      | 0.614 | 152      | 0.386 | 78                                  | 0.335 | 122      | 0.524 | 33       | 0.142                             | 233   | 278      | 0.597 | 188   | 0.403 |       |
|                    | cases      | 77       | 0.387                               | 98       | 0.492 | 24       | 0.121    | 199                               | 252      | 0.633 | 146      | 0.367 | 136                                 | 0.463 | 131      | 0.446 | 27       | 0.092                             | 294   | 403      | 0.685 | 185   | 0.315 |       |
| Supplementary SNPs | rs1157505  | controls | 103                                 | 0.557    | 73    | 0.395    | 9        | 0.049                             | 185      | 279   | 0.754    | 91    | 0.246                               | 134   | 0.573    | 89    | 0.380    | 11                                | 0.047 | 234      | 357   | 0.763 | 111   | 0.237 |
|                    |            | cases    | 123                                 | 0.621    | 63    | 0.318    | 12       | 0.061                             | 198      | 309   | 0.780    | 87    | 0.220                               | 212   | 0.709    | 76    | 0.254    | 11                                | 0.037 | 299      | 500   | 0.836 | 98    | 0.164 |
|                    | rs1891385  | controls | 157                                 | 0.826    | 30    | 0.158    | 3        | 0.016                             | 190      | 344   | 0.905    | 36    | 0.095                               | 158   | 0.760    | 48    | 0.231    | 2                                 | 0.010 | 208      | 364   | 0.875 | 52    | 0.125 |
|                    |            | cases    | 149                                 | 0.753    | 43    | 0.217    | 6        | 0.030                             | 198      | 341   | 0.861    | 55    | 0.139                               | 220   | 0.780    | 56    | 0.199    | 6                                 | 0.021 | 282      | 496   | 0.879 | 68    | 0.121 |
|                    | rs996029   | controls | 180                                 | 0.918    | 16    | 0.082    | 0        | 0.000                             | 196      | 376   | 0.959    | 16    | 0.041                               | 192   | 0.906    | 20    | 0.094    | 0                                 | 0.000 | 212      | 404   | 0.953 | 20    | 0.047 |
|                    |            | cases    | 182                                 | 0.924    | 15    | 0.076    | 0        | 0.000                             | 197      | 379   | 0.962    | 15    | 0.038                               | 259   | 0.918    | 23    | 0.082    | 0                                 | 0.000 | 282      | 541   | 0.959 | 23    | 0.041 |
|                    | rs16924161 | controls | 142                                 | 0.714    | 51    | 0.256    | 6        | 0.030                             | 199      | 335   | 0.842    | 63    | 0.158                               | 162   | 0.733    | 55    | 0.249    | 4                                 | 0.018 | 221      | 379   | 0.857 | 63    | 0.143 |
|                    |            | cases    | 147                                 | 0.739    | 49    | 0.246    | 3        | 0.015                             | 199      | 343   | 0.862    | 55    | 0.138                               | 218   | 0.779    | 57    | 0.204    | 5                                 | 0.018 | 280      | 493   | 0.880 | 67    | 0.120 |
|                    | rs10975511 | controls | 93                                  | 0.474    | 85    | 0.434    | 18       | 0.092                             | 196      | 271   | 0.691    | 121   | 0.309                               | 114   | 0.502    | 93    | 0.410    | 20                                | 0.088 | 227      | 321   | 0.707 | 133   | 0.293 |
|                    |            | cases    | 112                                 | 0.566    | 70    | 0.354    | 16       | 0.081                             | 198      | 294   | 0.742    | 102   | 0.258                               | 153   | 0.524    | 115   | 0.394    | 24                                | 0.082 | 292      | 421   | 0.721 | 163   | 0.279 |
|                    | rs7035413  | controls | 133                                 | 0.672    | 55    | 0.278    | 10       | 0.051                             | 198      | 321   | 0.811    | 75    | 0.189                               | 135   | 0.584    | 89    | 0.385    | 7                                 | 0.030 | 231      | 359   | 0.777 | 103   | 0.223 |
|                    |            | cases    | 119                                 | 0.595    | 74    | 0.370    | 7        | 0.035                             | 200      | 312   | 0.780    | 88    | 0.220                               | 149   | 0.521    | 114   | 0.399    | 23                                | 0.080 | 286      | 412   | 0.720 | 160   | 0.280 |
|                    | rs11792633 | controls | 90                                  | 0.469    | 84    | 0.438    | 18       | 0.094                             | 192      | 264   | 0.688    | 120   | 0.313                               | 95    | 0.420    | 107   | 0.473    | 24                                | 0.106 | 226      | 297   | 0.657 | 155   | 0.343 |
|                    |            | cases    | 91                                  | 0.457    | 85    | 0.427    | 23       | 0.116                             | 199      | 267   | 0.671    | 131   | 0.329                               | 142   | 0.570    | 85    | 0.341    | 22                                | 0.088 | 249      | 369   | 0.741 | 129   | 0.259 |
|                    | rs8172     | controls | 159                                 | 0.820    | 33    | 0.170    | 2        | 0.010                             | 194      | 351   | 0.905    | 37    | 0.095                               | 240   | 0.828    | 49    | 0.169    | 1                                 | 0.003 | 290      | 529   | 0.912 | 51    | 0.088 |
|                    |            | cases    | 170                                 | 0.876    | 23    | 0.119    | 1        | 0.005                             | 194      | 363   | 0.936    | 25    | 0.064                               | 195   | 0.837    | 38    | 0.163    | 0                                 | 0.000 | 233      | 428   | 0.918 | 38    | 0.082 |

<sup>a</sup> Frequent allele is coded 1 and minor allele is coded 2

**Table S4** Association of the rs1157505, rs11792633 and rs7044343 SNPs with the risk of developing AD according **(A)** in the combined case-control study (France, American and English) and **(B)** after stratification on the *APOE* status.

**A**

|            | OR (12+22 versus 11) <sup>a</sup><br>[95%-CI] | <i>P</i> <sup>a</sup> | OR (12+22 versus 11) <sup>b</sup><br>[95%-CI] | <i>P</i> <sup>b</sup> | <i>APOE</i><br><i>interaction</i> |
|------------|-----------------------------------------------|-----------------------|-----------------------------------------------|-----------------------|-----------------------------------|
| rs1157505  | 0.88 [0.78-1.01]                              | 0.06                  | 0.80 [0.69-0.93]                              | 0.004                 | 0.004                             |
| rs11792633 | 0.88 [0.77-1.01]                              | 0.07                  | 0.78 [0.68-0.91]                              | 0.001                 | 0.0001                            |
| rs7044343  | 0.88 [0.77-1.01]                              | 0.07                  | 0.79 [0.68-0.92]                              | 0.002                 | 0.002                             |

<sup>a</sup> adjusted for age, gender and centre

<sup>b</sup> adjusted for age, gender, centre and *APOE* status

**B**

|            | <b>Non-ε4 bearers</b>                         |                    | <b>ε4 bearers</b>                             |          |
|------------|-----------------------------------------------|--------------------|-----------------------------------------------|----------|
|            | OR (12+22 versus 11) <sup>a</sup><br>[95%-CI] | <i>P</i>           | OR (12+22 versus 11) <sup>a</sup><br>[95%-CI] | <i>P</i> |
| rs1157505  | 0.67 [0.55-0.82]                              | 6x10 <sup>-5</sup> | 1.07 [0.82-1.38]                              | ns       |
| rs11792633 | 0.63 [0.52-0.76]                              | 1x10 <sup>-6</sup> | 1.16 [0.90-1.50]                              | ns       |
| rs7044343  | 0.67 [0.56-0.81]                              | 3x10 <sup>-5</sup> | 1.10 [0.85-1.43]                              | ns       |

<sup>a</sup> adjusted for age, gender and centre

**Table S5** Genotypic and allelic distribution of the rs115505, rs1179633 and rs7044343 SNPs in the whole American, English, French and combined populations.

|                  |          | Genotype distribution <sup>a</sup> |       |     |       |     |       |       |      | Allele distribution <sup>a</sup> |      |       |      |       |       |
|------------------|----------|------------------------------------|-------|-----|-------|-----|-------|-------|------|----------------------------------|------|-------|------|-------|-------|
|                  |          | 11                                 |       | 12  |       | 22  |       | Total |      |                                  | 1    |       | 2    |       |       |
|                  |          | n                                  | freq  | n   | freq  | n   | freq  | n     | p    | p trend                          | n    | freq  | n    | freq  | p     |
| <b>rs1157505</b> |          |                                    |       |     |       |     |       |       |      |                                  |      |       |      |       |       |
| French           | controls | 406                                | 0.604 | 224 | 0.333 | 42  | 0.063 | 672   | 0.01 | 0.007                            | 1036 | 0.771 | 308  | 0.229 | 0.006 |
|                  | cases    | 508                                | 0.658 | 238 | 0.308 | 26  | 0.034 | 772   |      |                                  | 1254 | 0.812 | 290  | 0.188 |       |
| American         | controls | 426                                | 0.584 | 267 | 0.366 | 37  | 0.051 | 730   | 0.47 | 0.72                             | 1119 | 0.766 | 341  | 0.234 | 0.72  |
|                  | cases    | 439                                | 0.603 | 246 | 0.338 | 43  | 0.059 | 728   |      |                                  | 1124 | 0.772 | 332  | 0.228 |       |
| English          | controls | 111                                | 0.561 | 75  | 0.379 | 12  | 0.061 | 198   | 0.92 | 0.69                             | 297  | 0.750 | 99   | 0.250 | 0.69  |
|                  | cases    | 202                                | 0.546 | 143 | 0.386 | 25  | 0.068 | 370   |      |                                  | 547  | 0.739 | 193  | 0.261 |       |
| Pooled           | controls | 923                                | 0.590 | 551 | 0.352 | 90  | 0.058 | 1564  | 0.35 | 0.15                             | 2397 | 0.766 | 731  | 0.234 | 0.15  |
|                  | cases    | 1123                               | 0.613 | 616 | 0.336 | 93  | 0.051 | 1832  |      |                                  | 2862 | 0.781 | 802  | 0.219 |       |
| <b>rs1179633</b> |          |                                    |       |     |       |     |       |       |      |                                  |      |       |      |       |       |
| French           | controls | 300                                | 0.463 | 287 | 0.443 | 61  | 0.094 | 648   | 0.08 | 0.02                             | 887  | 0.684 | 409  | 0.316 | 0.03  |
|                  | cases    | 383                                | 0.516 | 307 | 0.414 | 52  | 0.070 | 742   |      |                                  | 1073 | 0.723 | 411  | 0.277 |       |
| American         | controls | 337                                | 0.462 | 320 | 0.438 | 73  | 0.100 | 730   | 0.98 | 0.88                             | 994  | 0.681 | 466  | 0.319 | 0.88  |
|                  | cases    | 339                                | 0.466 | 317 | 0.435 | 72  | 0.099 | 728   |      |                                  | 995  | 0.683 | 461  | 0.317 |       |
| English          | controls | 87                                 | 0.439 | 94  | 0.475 | 17  | 0.086 | 198   | 0.61 | 0.32                             | 268  | 0.677 | 128  | 0.323 | 0.34  |
|                  | cases    | 178                                | 0.481 | 165 | 0.446 | 27  | 0.073 | 370   |      |                                  | 521  | 0.704 | 219  | 0.296 |       |
| Pooled           | controls | 714                                | 0.457 | 699 | 0.447 | 151 | 0.097 | 1564  | 0.11 | 0.03                             | 2127 | 0.680 | 1001 | 0.320 | 0.04  |
|                  | cases    | 895                                | 0.489 | 787 | 0.430 | 150 | 0.082 | 1832  |      |                                  | 2577 | 0.703 | 1087 | 0.297 |       |
| <b>rs7044343</b> |          |                                    |       |     |       |     |       |       |      |                                  |      |       |      |       |       |
| French           | controls | 241                                | 0.370 | 320 | 0.492 | 90  | 0.138 | 651   | 0.01 | 0.004                            | 802  | 0.616 | 500  | 0.384 | 0.005 |
|                  | cases    | 331                                | 0.434 | 356 | 0.467 | 76  | 0.100 | 763   |      |                                  | 1018 | 0.667 | 508  | 0.333 |       |
| American         | controls | 274                                | 0.375 | 351 | 0.481 | 105 | 0.144 | 730   | 0.99 | 0.95                             | 899  | 0.616 | 561  | 0.384 | 0.95  |
|                  | cases    | 273                                | 0.375 | 352 | 0.484 | 103 | 0.141 | 728   |      |                                  | 898  | 0.617 | 558  | 0.383 |       |
| English          | controls | 70                                 | 0.354 | 102 | 0.515 | 26  | 0.131 | 198   | 0.46 | 0.23                             | 242  | 0.611 | 154  | 0.389 | 0.24  |
|                  | cases    | 150                                | 0.405 | 178 | 0.481 | 42  | 0.114 | 370   |      |                                  | 478  | 0.646 | 262  | 0.354 |       |
| Pooled           | controls | 582                                | 0.372 | 764 | 0.488 | 218 | 0.139 | 1564  | 0.09 | 0.03                             | 1928 | 0.616 | 1200 | 0.384 | 0.03  |
|                  | cases    | 739                                | 0.403 | 872 | 0.476 | 221 | 0.121 | 1832  |      |                                  | 2350 | 0.641 | 1314 | 0.359 |       |

<sup>a</sup> Frequent allele is coded 1 and minor allele is coded 2

**Table S6** Genotypic and allelic distribution of the rs115505, rs1179633 and rs7044343 SNPs in the American, English, French and combined non-ε4 bearers.

|                  |          | Genotype distribution in non-ε4 bearers <sup>a</sup> |       |     |       |     |       |       |                    | Allele distribution in non-ε4 bearers <sup>a</sup> |      |       |     |       |                    |
|------------------|----------|------------------------------------------------------|-------|-----|-------|-----|-------|-------|--------------------|----------------------------------------------------|------|-------|-----|-------|--------------------|
|                  |          | 11                                                   |       | 12  |       | 22  |       | Total |                    | 1                                                  |      | 2     |     | p     |                    |
|                  |          | n                                                    | freq  | n   | freq  | n   | freq  | n     | p                  | p trend                                            | n    | freq  | n   |       | freq               |
| <b>rs1157505</b> |          |                                                      |       |     |       |     |       |       |                    |                                                    |      |       |     |       |                    |
| French           | controls | 298                                                  | 0.596 | 165 | 0.330 | 37  | 0.074 | 500   | 0.04               | 0.04                                               | 761  | 0.761 | 239 | 0.239 | 0.01               |
|                  | cases    | 195                                                  | 0.675 | 82  | 0.284 | 12  | 0.042 | 289   |                    |                                                    | 472  | 0.817 | 106 | 0.183 |                    |
| American         | controls | 343                                                  | 0.591 | 207 | 0.357 | 30  | 0.052 | 580   | 0.03               | 0.01                                               | 893  | 0.770 | 267 | 0.230 | 0.01               |
|                  | cases    | 208                                                  | 0.684 | 84  | 0.276 | 12  | 0.039 | 304   |                    |                                                    | 500  | 0.822 | 108 | 0.178 |                    |
| English          | controls | 86                                                   | 0.544 | 60  | 0.380 | 12  | 0.076 | 158   | 0.18               | 0.09                                               | 232  | 0.734 | 84  | 0.266 | 0.09               |
|                  | cases    | 78                                                   | 0.624 | 43  | 0.344 | 4   | 0.032 | 125   |                    |                                                    | 199  | 0.796 | 51  | 0.204 |                    |
| Pooled           | controls | 727                                                  | 0.587 | 432 | 0.349 | 79  | 0.064 | 1238  | 6.10 <sup>-4</sup> | 1.10 <sup>-4</sup>                                 | 1886 | 0.762 | 590 | 0.238 | 9.10 <sup>-5</sup> |
|                  | cases    | 481                                                  | 0.670 | 209 | 0.291 | 28  | 0.039 | 718   |                    |                                                    | 1171 | 0.815 | 265 | 0.185 |                    |
| <b>rs1179633</b> |          |                                                      |       |     |       |     |       |       |                    |                                                    |      |       |     |       |                    |
| French           | controls | 220                                                  | 0.440 | 227 | 0.454 | 53  | 0.106 | 500   | 1.10 <sup>-4</sup> | 1.10 <sup>-4</sup>                                 | 667  | 0.667 | 333 | 0.333 | 1.10 <sup>-4</sup> |
|                  | cases    | 173                                                  | 0.599 | 93  | 0.322 | 23  | 0.080 | 289   |                    |                                                    | 439  | 0.760 | 139 | 0.240 |                    |
| American         | controls | 266                                                  | 0.459 | 252 | 0.434 | 62  | 0.107 | 580   | 0.02               | 0.005                                              | 784  | 0.676 | 376 | 0.324 | 0.02               |
|                  | cases    | 165                                                  | 0.536 | 120 | 0.390 | 23  | 0.075 | 308   |                    |                                                    | 450  | 0.731 | 166 | 0.269 |                    |
| English          | controls | 69                                                   | 0.437 | 73  | 0.462 | 16  | 0.101 | 158   | 0.20               | 0.10                                               | 211  | 0.668 | 105 | 0.332 | 0.12               |
|                  | cases    | 63                                                   | 0.504 | 56  | 0.448 | 6   | 0.048 | 125   |                    |                                                    | 182  | 0.728 | 68  | 0.272 |                    |
| Pooled           | controls | 555                                                  | 0.448 | 552 | 0.446 | 131 | 0.106 | 1238  | 5.10 <sup>-6</sup> | 1.10 <sup>-6</sup>                                 | 1662 | 0.671 | 814 | 0.329 | 1.10 <sup>-6</sup> |
|                  | cases    | 401                                                  | 0.558 | 269 | 0.375 | 48  | 0.067 | 718   |                    |                                                    | 1071 | 0.746 | 365 | 0.254 |                    |
| <b>rs7044343</b> |          |                                                      |       |     |       |     |       |       |                    |                                                    |      |       |     |       |                    |
| French           | controls | 179                                                  | 0.358 | 246 | 0.492 | 75  | 0.150 | 500   | 3.10 <sup>-4</sup> | 3.10 <sup>-4</sup>                                 | 604  | 0.604 | 396 | 0.396 | 9.10 <sup>-5</sup> |
|                  | cases    | 144                                                  | 0.498 | 118 | 0.408 | 27  | 0.093 | 289   |                    |                                                    | 406  | 0.702 | 172 | 0.298 |                    |
| American         | controls | 217                                                  | 0.374 | 274 | 0.472 | 89  | 0.153 | 580   | 0.05               | 0.02                                               | 708  | 0.610 | 452 | 0.390 | 0.02               |
|                  | cases    | 131                                                  | 0.431 | 143 | 0.470 | 30  | 0.099 | 304   |                    |                                                    | 405  | 0.666 | 203 | 0.334 |                    |
| English          | controls | 57                                                   | 0.361 | 80  | 0.506 | 21  | 0.133 | 158   | 0.14               | 0.06                                               | 194  | 0.614 | 122 | 0.386 | 0.07               |
|                  | cases    | 56                                                   | 0.448 | 60  | 0.480 | 9   | 0.072 | 125   |                    |                                                    | 172  | 0.688 | 78  | 0.312 |                    |
| Pooled           | controls | 453                                                  | 0.366 | 600 | 0.485 | 185 | 0.149 | 1238  | 9.10 <sup>-6</sup> | 1.10 <sup>-6</sup>                                 | 1506 | 0.608 | 970 | 0.392 | 2.10 <sup>-6</sup> |
|                  | cases    | 331                                                  | 0.459 | 324 | 0.449 | 66  | 0.092 | 721   |                    |                                                    | 986  | 0.684 | 456 | 0.316 |                    |

<sup>a</sup> Frequent allele is coded 1 and minor allele is coded 2

**Table S7** Genotypic and allelic distribution of the rs115505, rs1179633 and rs7044343 SNPs in the American, English, French and combined  $\epsilon 4$  bearers.

|                  |          | Genotype distribution in $\epsilon 4$ bearers <sup>a</sup> |       |     |       |     |       |       |      |         | Allele distribution in $\epsilon 4$ bearers <sup>a</sup> |       |     |       |      |
|------------------|----------|------------------------------------------------------------|-------|-----|-------|-----|-------|-------|------|---------|----------------------------------------------------------|-------|-----|-------|------|
|                  |          | 11                                                         |       | 12  |       | 22  |       | Total |      |         | 1                                                        |       | 2   |       |      |
|                  |          | n                                                          | freq  | n   | freq  | n   | freq  | n     | p    | p trend | n                                                        | freq  | n   | freq  | p    |
| <b>rs1157505</b> |          |                                                            |       |     |       |     |       |       |      |         |                                                          |       |     |       |      |
| French           | controls | 94                                                         | 0.639 | 48  | 0.327 | 5   | 0.034 | 147   | 0.97 | 0.86    | 236                                                      | 0.803 | 58  | 0.197 | 0.85 |
|                  | cases    | 301                                                        | 0.645 | 152 | 0.325 | 14  | 0.030 | 467   |      |         | 754                                                      | 0.807 | 180 | 0.193 |      |
| American         | controls | 83                                                         | 0.553 | 60  | 0.400 | 7   | 0.047 | 150   | 0.53 | 0.55    | 226                                                      | 0.753 | 74  | 0.247 | 0.56 |
|                  | cases    | 231                                                        | 0.545 | 162 | 0.382 | 31  | 0.073 | 424   |      |         | 624                                                      | 0.736 | 224 | 0.264 |      |
| English          | controls | 28                                                         | 0.636 | 16  | 0.364 | 0   | 0.000 | 44    | 0.08 | 0.04    | 72                                                       | 0.818 | 16  | 0.182 | 0.04 |
|                  | cases    | 139                                                        | 0.517 | 106 | 0.394 | 24  | 0.089 | 269   |      |         | 384                                                      | 0.714 | 154 | 0.286 |      |
| Pooled           | controls | 205                                                        | 0.601 | 124 | 0.364 | 12  | 0.035 | 341   | 0.21 | 0.2     | 534                                                      | 0.783 | 148 | 0.217 | 0.2  |
|                  | cases    | 671                                                        | 0.578 | 420 | 0.362 | 69  | 0.059 | 1160  |      |         | 1762                                                     | 0.759 | 558 | 0.241 |      |
| <b>rs1179633</b> |          |                                                            |       |     |       |     |       |       |      |         |                                                          |       |     |       |      |
| French           | controls | 73                                                         | 0.525 | 58  | 0.417 | 8   | 0.058 | 139   | 0.43 | 0.23    | 204                                                      | 0.734 | 74  | 0.266 | 0.26 |
|                  | cases    | 207                                                        | 0.462 | 212 | 0.473 | 29  | 0.065 | 448   |      |         | 626                                                      | 0.699 | 270 | 0.301 |      |
| American         | controls | 71                                                         | 0.473 | 68  | 0.453 | 11  | 0.073 | 150   | 0.16 | 0.07    | 210                                                      | 0.700 | 90  | 0.300 | 0.07 |
|                  | cases    | 174                                                        | 0.410 | 197 | 0.465 | 53  | 0.125 | 424   |      |         | 545                                                      | 0.643 | 303 | 0.357 |      |
| English          | controls | 18                                                         | 0.450 | 21  | 0.525 | 1   | 0.025 | 40    | 0.35 | 0.77    | 57                                                       | 0.713 | 23  | 0.288 | 0.78 |
|                  | cases    | 122                                                        | 0.477 | 113 | 0.441 | 21  | 0.082 | 256   |      |         | 357                                                      | 0.697 | 155 | 0.303 |      |
| Pooled           | controls | 162                                                        | 0.492 | 147 | 0.447 | 20  | 0.061 | 329   | 0.12 | 0.05    | 471                                                      | 0.716 | 187 | 0.284 | 0.06 |
|                  | cases    | 503                                                        | 0.446 | 522 | 0.463 | 103 | 0.091 | 1128  |      |         | 1528                                                     | 0.677 | 728 | 0.323 |      |
| <b>rs7044343</b> |          |                                                            |       |     |       |     |       |       |      |         |                                                          |       |     |       |      |
| French           | controls | 59                                                         | 0.421 | 69  | 0.493 | 12  | 0.086 | 140   | 0.72 | 0.43    | 187                                                      | 0.668 | 93  | 0.332 | 0.45 |
|                  | cases    | 181                                                        | 0.393 | 230 | 0.500 | 49  | 0.107 | 460   |      |         | 592                                                      | 0.643 | 328 | 0.357 |      |
| American         | controls | 57                                                         | 0.380 | 77  | 0.513 | 16  | 0.107 | 150   | 0.15 | 0.09    | 191                                                      | 0.637 | 109 | 0.363 | 0.09 |
|                  | cases    | 142                                                        | 0.335 | 209 | 0.493 | 73  | 0.172 | 424   |      |         | 493                                                      | 0.581 | 355 | 0.419 |      |
| English          | controls | 17                                                         | 0.378 | 23  | 0.511 | 5   | 0.111 | 45    | 0.67 | 0.84    | 57                                                       | 0.633 | 33  | 0.367 | 0.83 |
|                  | cases    | 109                                                        | 0.396 | 124 | 0.451 | 42  | 0.153 | 275   |      |         | 342                                                      | 0.622 | 208 | 0.378 |      |
| Pooled           | controls | 133                                                        | 0.397 | 169 | 0.504 | 33  | 0.099 | 335   | 0.12 | 0.11    | 435                                                      | 0.649 | 235 | 0.351 | 0.11 |
|                  | cases    | 432                                                        | 0.373 | 563 | 0.486 | 164 | 0.142 | 1159  |      |         | 1427                                                     | 0.616 | 891 | 0.384 |      |

<sup>a</sup> Frequent allele is coded 1 and minor allele is coded 2

**Table S8** Estimated Haplotype distributions in non-ε4 bearers in the American, French, English and combined populations.

| rs1157505 / rs11792633 / rs7044343 <sup>a</sup> | Controls                 |          | Cases |          | OR [95% C.I.]    | P                        |
|-------------------------------------------------|--------------------------|----------|-------|----------|------------------|--------------------------|
|                                                 | freq.                    | <i>n</i> | freq. | <i>n</i> |                  |                          |
| American non-ε4 bearers                         |                          |          |       |          |                  |                          |
| <b>111</b>                                      | 0.55                     | 643      | 0.62  | 379      | ref.             |                          |
| <b>222</b>                                      | 0.18                     | 204      | 0.13  | 81       | 0.67 [0.50-0.91] | <b>0.007</b>             |
| <b>122</b>                                      | 0.14                     | 161      | 0.12  | 76       | 0.80 [0.59-1.09] | 0.15                     |
| <b>112</b>                                      | 0.07                     | 85       | 0.07  | 44       | 0.88 [0.59-1.31] | 0.51                     |
| <i>P</i> <sup>b</sup>                           | <b>0.04</b>              |          |       |          |                  |                          |
| French non-ε4 bearers                           |                          |          |       |          |                  |                          |
| <b>111</b>                                      | 0.54                     | 550      | 0.63  | 388      | ref.             |                          |
| <b>222</b>                                      | 0.18                     | 179      | 0.12  | 76       | 0.60 [0.44-0.82] | <b>8.10<sup>-4</sup></b> |
| <b>122</b>                                      | 0.15                     | 154      | 0.11  | 70       | 0.64 [0.47-0.89] | <b>0.005</b>             |
| <b>112</b>                                      | 0.07                     | 67       | 0.07  | 41       | 0.87 [0.56-1.33] | 0.50                     |
| <i>P</i> <sup>b</sup>                           | <b>0.001</b>             |          |       |          |                  |                          |
| English non-ε4 bearers                          |                          |          |       |          |                  |                          |
| <b>111</b>                                      | 0.54                     | 173      | 0.64  | 161      | ref.             |                          |
| <b>222</b>                                      | 0.20                     | 65       | 0.16  | 39       | 0.64 [0.40-1.04] | <b>0.05</b>              |
| <b>122</b>                                      | 0.11                     | 34       | 0.11  | 27       | 0.85 [0.48-1.53] | 0.57                     |
| <b>112</b>                                      | 0.07                     | 23       | 0.05  | 12       | 0.56 [0.44-1.22] | 0.12                     |
| <i>P</i> <sup>b</sup>                           | 0.15                     |          |       |          |                  |                          |
| Combined non-ε4 bearers                         |                          |          |       |          |                  |                          |
| <b>111</b>                                      | 0.55                     | 1366     | 0.63  | 928      | ref.             |                          |
| <b>222</b>                                      | 0.18                     | 449      | 0.13  | 197      | 0.65 [0.53-0.78] | <b>4.10<sup>-6</sup></b> |
| <b>122</b>                                      | 0.14                     | 350      | 0.12  | 174      | 0.73 [0.60-0.90] | <b>0.002</b>             |
| <b>112</b>                                      | 0.07                     | 175      | 0.07  | 97       | 0.82 [0.62-1.07] | 0.13                     |
| <i>P</i> <sup>b</sup>                           | <b>7.10<sup>-6</sup></b> |          |       |          |                  |                          |

<sup>a</sup> Frequent allele is coded 1 and minor allele is coded 2

<sup>b</sup> *P* for global haplotype effect

**Table S9** Allele and genotype distributions of the rs1157505, rs11792633 and rs11792343 SNPs in the control cohort and AD case populations.

|                           | p           |             | Genotype distribution (%) |                   |             | p          | p for trend |        |
|---------------------------|-------------|-------------|---------------------------|-------------------|-------------|------------|-------------|--------|
| <b>rs1157505</b>          | C           | G           |                           | CC                | CG          | GG         |             |        |
| Controls                  | 9858 (0.80) | 2540 (0.20) |                           | 3932 (0.63)       | 1994 (0.32) | 273 (0.04) |             |        |
| all AD cases <sup>a</sup> | 385 (0.85)  | 67 (0.15)   | 0.003 <sup>b</sup>        | 163 (0.72)        | 59 (0.26)   | 4 (0.02)   | 0.01        | 0.003  |
| incident AD cases         | 232 (0.86)  | 38 (0.14)   | 0.01 <sup>c</sup>         | <b>100 (0.74)</b> | 32 (0.24)   | 3 (0.02)   | 0.03        | 0.01   |
| <b>rs11792633</b>         | C           | T           |                           | CC                | CT          | TT         |             |        |
| Controls                  | 8696 (0.70) | 3702 (0.30) |                           | 3047 (0.49)       | 2602 (0.42) | 550 (0.09) |             |        |
| all AD cases <sup>a</sup> | 352 (0.78)  | 100 (0.22)  | 0.0004 <sup>d</sup>       | 139 (0.61)        | 74 (0.33)   | 13 (0.06)  | 0.001       | 0.0004 |
| incident AD cases         | 207 (0.77)  | 63 (0.23)   | 0.02 <sup>e</sup>         | <b>80 (0.59)</b>  | 47 (0.35)   | 8 (0.06)   | 0.05        | 0.02   |
| <b>rs11792343</b>         | T           | C           |                           | TT                | CT          | CC         |             |        |
| Controls                  | 7950 (0.64) | 4448 (0.36) |                           | 2550 (0.41)       | 2850 (0.46) | 799 (0.13) |             |        |
| all AD cases <sup>a</sup> | 321 (0.71)  | 131 (0.29)  | 0.003 <sup>f</sup>        | 118 (0.52)        | 85 (0.38)   | 23 (0.10)  | 0.004       | 0.003  |
| incident AD cases         | 189 (0.70)  | 81 (0.30)   | 0.05 <sup>g</sup>         | <b>69 (0.51)</b>  | 51 (0.38)   | 15 (0.11)  | ns          | 0.02   |

<sup>a</sup> all AD cases: prevalent and incident cases

<sup>b</sup> Allelic OR (G versus C) = 0.68, 95% CI [0.51-0.89]

<sup>c</sup> Allelic OR (G versus C) = 0.64, 95% CI [0.44-0.91]

<sup>d</sup> Allelic OR (T versus C) = 0.67, 95% CI [0.53-0.84]

<sup>e</sup> Allelic OR (T versus C) = 0.71, 95% CI [0.53-0.93]

<sup>f</sup> Allelic OR (C versus T) = 0.73, 95% CI [0.59-0.90]

<sup>g</sup> Allelic OR (C versus T) = 0.77, 95% CI [0.58-1.00]



**Table S10** Associations between *IL33* SNPs and the risk of AD according to the *APOE* status

|            |                 | all AD cases <sup>a</sup> |        | incident AD cases |       |
|------------|-----------------|---------------------------|--------|-------------------|-------|
|            |                 | OR ( 95% CI)              | p      | HR (95% CI)       | p     |
| rs1157505  | All             | 0.64 (0.47-0.89)          | 0.007  | 0.72 (0.52-1.00)  | 0.05  |
|            | non-ε4 carriers | 0.56 (0.37-0.85)          | 0.006  | 0.63 (0.43-0.96)  | 0.03  |
|            | ε4 carriers     | 0.80 (0.48-1.35)          | ns     | 0.94 (0.55-1.59)  | ns    |
| rs11792633 | All             | 0.61 (0.46-0.82)          | 0.0009 | 0.67 (0.50-0.90)  | 0.008 |
|            | non-ε4 carriers | 0.58 (0.44-0.84)          | 0.004  | 0.64 (0.44-0.92)  | 0.02  |
|            | ε4 carriers     | 0.64 (0.40-1.04)          | ns     | 0.71 (0.42-1.18)  | ns    |
| rs7044343  | All             | 0.64 (0.48-0.85)          | 0.002  | 0.70 (0.53-0.94)  | 0.02  |
|            | non-ε4 carriers | 0.62 (0.43-0.88)          | 0.008  | 0.67 (0.47-0.96)  | 0.05  |
|            | ε4 carriers     | 0.69 (0.42-1.12)          | ns     | 0.74 (0.45-1.22)  | ns    |

<sup>a</sup> all AD cases: prevalent and incident cases

Odds ratio (95% CI) for all AD cases (n=226) and hazard ratio (95% CI) for incident AD cases (n=135)

Adjusted for age, centre, gender, educational level, hypertension, BMI, diabetes, history of vascular disease and apolipoprotein E (APOE) genotype, when necessary.

**Table S11** Associations between *IL33* haplotypes and the risk of AD, according to the *APOE* status

| rs1157505 / rs11792633<br>/ rs7044343 | all AD cases (n=226) <sup>a</sup> |          |                  |        | incident AD cases (n=135) |          |                  |       |
|---------------------------------------|-----------------------------------|----------|------------------|--------|---------------------------|----------|------------------|-------|
|                                       | AD cases                          | Controls | OR (95% CI)      | p      | AD cases                  | Controls | HR (95% CI)      | p     |
| All                                   |                                   |          |                  |        |                           |          |                  |       |
| CCT                                   | 0.593                             | 0.654    | Ref.             |        | 0.593                     | 0.656    | Ref.             |       |
| GTC                                   | 0.157                             | 0.094    | 0.54 (0.38-0.75) | 0.0003 | 0.157                     | 0.103    | 0.62 (0.42-0.93) | 0.01  |
| CTC                                   | 0.138                             | 0.123    | 0.79 (0.58-1.07) | ns     | 0.138                     | 0.122    | 0.78 (0.55-1.12) | ns    |
| CCC                                   | 0.062                             | 0.071    | 1.01 (0.67-1.52) | ns     | 0.062                     | 0.074    | 1.10 (0.68-1.79) | ns    |
| GCT                                   | 0.045                             | 0.052    | 1.00 (0.62-1.61) | ns     | 0.045                     | 0.037    | 0.80 (0.44-1.44) | ns    |
| non-ε4 bearers                        |                                   |          |                  |        |                           |          |                  |       |
| CCT                                   | 0.591                             | 0.653    | Ref.             |        | 0.593                     | 0.634    | Ref.             |       |
| GTC                                   | 0.159                             | 0.070    | 0.39 (0.23-0.67) | 0.0005 | 0.161                     | 0.070    | 0.42 (0.22-0.80) | 0.009 |
| CTC                                   | 0.137                             | 0.142    | 0.89 (0.62-1.29) | ns     | 0.136                     | 0.163    | 1.04 (0.69-1.59) | ns    |
| CCC                                   | 0.063                             | 0.073    | 1.03 (0.61-1.73) | ns     | 0.062                     | 0.081    | 1.28 (0.70-2.34) | ns    |
| GCT                                   | 0.046                             | 0.056    | 1.11 (0.62-1.95) | ns     | 0.044                     | 0.041    | 0.98 (0.49-1.97) | ns    |
| ε4 bearers                            |                                   |          |                  |        |                           |          |                  |       |
| CCT                                   | 0.599                             | 0.652    | Ref.             |        | 0.602                     | 0.704    | Ref.             |       |
| GTC                                   | 0.149                             | 0.131    | 0.82 (0.51-1.33) | ns     | 0.151                     | 0.142    | 0.85 (0.49-1.49) | ns    |
| CTC                                   | 0.142                             | 0.092    | 0.66 (0.38-1.16) | ns     | 0.140                     | 0.071    | 0.51 (0.24-1.05) | ns    |
| CCC                                   | 0.058                             | 0.067    | 1.08 (0.54-2.16) | ns     | 0.058                     | 0.031    | 0.45 (0.14-1.49) | ns    |
| GCT                                   | 0.043                             | 0.047    | 0.87 (0.36-2.05) | ns     | 0.040                     | 0.020    | 0.46 (0.11-1.98) | ns    |

<sup>a</sup>all AD cases: prevalent and incident cases

Odds ratio (95% CI) for all AD cases (n=226) and hazard ratio (95% CI) for incident AD cases (n=135).

Adjusted for age, home city, gender.

**Table S12.** Allele and genotype distributions of the rs1157505, rs11792633 and rs11792343 SNPs in the control cohort and cases suffering from other types of dementia.

| <b>rs1157505</b>                | C           | G           |                 | CC          | CG          | GG         |    |    |
|---------------------------------|-------------|-------------|-----------------|-------------|-------------|------------|----|----|
| Controls                        | 9858 (0.80) | 2540 (0.20) |                 | 3932 (0.63) | 1994 (0.32) | 273 (0.04) |    |    |
| all demented cases <sup>a</sup> | 196 (0.79)  | 52 (0.21)   | ns <sup>b</sup> | 75 (0.60)   | 46 (0.37)   | 3 (0.02)   | ns | ns |
| incident demented cases         | 112 (0.78)  | 32 (0.22)   | ns <sup>c</sup> | 42 (0.58)   | 28 (0.39)   | 2 (0.03)   | ns | ns |
| <b>rs11792633</b>               | C           | T           |                 | CC          | CT          | TT         |    |    |
| Controls                        | 8696 (0.70) | 3702 (0.30) |                 | 3047 (0.49) | 2602 (0.42) | 550 (0.09) |    |    |
| all demented cases <sup>a</sup> | 176 (0.71)  | 72 (0.29)   | ns <sup>d</sup> | 62 (0.50)   | 52 (0.42)   | 10 (0.08)  | ns | ns |
| incident demented cases         | 105 (0.73)  | 39 (0.27)   | ns <sup>e</sup> | 38 (0.53)   | 29 (0.40)   | 5 (0.07)   | ns | ns |
| <b>rs11792633</b>               | T           | C           |                 | TT          | CT          | CC         |    |    |
| Controls                        | 7950 (0.64) | 4448 (0.36) |                 | 2550 (0.41) | 2850 (0.46) | 799 (0.13) |    |    |
| all demented cases <sup>a</sup> | 321 (0.65)  | 131 (0.35)  | ns <sup>f</sup> | 49 (0.40)   | 63 (0.51)   | 12 (0.10)  | ns | ns |
| incident demented cases         | 98 (0.68)   | 46 (0.32)   | ns <sup>g</sup> | 32 (0.44)   | 34 (0.47)   | 6 (0.08)   | ns | ns |

<sup>a</sup> all demented cases: prevalent and incident cases

<sup>b</sup> Allelic OR (G versus C) = 1.03, 95% CI [0.75-1.22]

<sup>c</sup> Allelic OR (G versus C) = 1.11, 95% CI [0.73-1.27]

<sup>d</sup> Allelic OR (T versus C) = 0.96, 95% CI [0.72-1.28]

<sup>e</sup> Allelic OR (T versus C) = 0.87, 95% CI [0.59-1.28]

<sup>f</sup> Allelic OR (C versus T) = 0.97, 95% CI [0.74-1.27]

<sup>g</sup> Allelic OR (C versus T) = 0.85, 95% CI [0.58-1.21]

**Table S13** Genotypic and allelic distribution of the rs10975519 SNP in the Reiman's study (**A**) and Li's study (**B**).

**A**

| rs10975519 | Genotype distribution <sup>a</sup> |      |     |      |    |      |      |         | Allele distribution <sup>a</sup> |      |     |      |      |
|------------|------------------------------------|------|-----|------|----|------|------|---------|----------------------------------|------|-----|------|------|
|            | 11                                 |      | 12  |      | 22 |      | p    | p trend | 1                                |      | 2   |      | p    |
|            | n                                  | freq | n   | freq | n  | freq |      |         | n                                | freq | n   | freq |      |
| Controls   | 214                                | 0.41 | 261 | 0.50 | 51 | 0.10 | 0.01 | 0.05    | 689                              | 0.65 | 363 | 0.34 | 0.05 |
| Cases      | 407                                | 0.48 | 350 | 0.42 | 85 | 0.10 |      |         | 1164                             | 0.69 | 520 | 0.31 |      |

<sup>a</sup> Frequent allele is coded 1 and minor allele is coded 2

| rs10975519 | Genotype distribution in non-ε4 bearers <sup>a</sup> |      |     |      |    |      |      |         | Allele distribution in non-ε4 bearers <sup>a</sup> |      |     |      |      |
|------------|------------------------------------------------------|------|-----|------|----|------|------|---------|----------------------------------------------------|------|-----|------|------|
|            | 11                                                   |      | 12  |      | 22 |      | p    | p trend | 1                                                  |      | 2   |      | p    |
|            | n                                                    | freq | n   | freq | n  | freq |      |         | n                                                  | freq | n   | freq |      |
| Controls   | 168                                                  | 0.41 | 203 | 0.49 | 40 | 0.10 | 0.05 | 0.04    | 539                                                | 0.66 | 283 | 0.34 | 0.05 |
| Cases      | 161                                                  | 0.50 | 133 | 0.41 | 29 | 0.09 |      |         | 455                                                | 0.70 | 191 | 0.30 |      |

<sup>a</sup> Frequent allele is coded 1 and minor allele is coded 2

**B**

| rs10975519 | Genotype distribution <sup>a</sup> |      |     |      |    |      |      |         | Allele distribution <sup>a</sup> |      |     |      |      |
|------------|------------------------------------|------|-----|------|----|------|------|---------|----------------------------------|------|-----|------|------|
|            | 11                                 |      | 12  |      | 22 |      | p    | p trend | 1                                |      | 2   |      | p    |
|            | n                                  | freq | n   | freq | n  | freq |      |         | n                                | freq | n   | freq |      |
| Controls   | 339                                | 0.49 | 297 | 0.43 | 53 | 0.08 | 0.59 | 0.87    | 975                              | 0.71 | 403 | 0.29 | 0.58 |
| Cases      | 339                                | 0.49 | 292 | 0.42 | 64 | 0.09 |      |         | 970                              | 0.70 | 420 | 0.30 |      |

<sup>a</sup> Frequent allele is coded 1 and minor allele is coded 2

**Table S14** Main characteristics of the different populations used in this study. **(A)** Complete French, American and English case-control studies. **(B)** French and American case-control sub-populations obtained by drawing lots from the complete French and American case-control studies.

| <b>A</b>          | French case-control study |            | American case-control study |            | English case-control study |            |
|-------------------|---------------------------|------------|-----------------------------|------------|----------------------------|------------|
|                   | AD cases                  | controls   | AD cases                    | controls   | AD cases                   | controls   |
| n                 | 734                       | 636        | 871                         | 829        | 370                        | 167        |
| Mean age          | 73.0 ± 8.4                | 73.1 ± 8.5 | 76.2 ± 6.2                  | 73.6 ± 6.4 | 74.9 ± 7.4                 | 68.2 ± 6.4 |
| Mean age at onset | 69.5 ± 7.4                | -          | 72.9 ± 6.3                  | -          | n.a                        | -          |
| % of men          | 37                        | 37         | 42                          | 38         | 43                         | 38         |

| <b>B</b>          | French case-control sub-population |            | American case-control sub-population |            |
|-------------------|------------------------------------|------------|--------------------------------------|------------|
|                   | AD cases                           | controls   | AD cases                             | controls   |
| n                 | 307                                | 238        | 200                                  | 200        |
| Mean age          | 74.1 ± 7.8                         | 73.1 ± 8.5 | 77.2 ± 6.1                           | 74.3 ± 5.8 |
| Mean age at onset | 68.6 ± 8.2                         | -          | 72.0 ± 12.3                          | -          |
| % of men          | 35                                 | 43         | 42                                   | 38         |

**Table S15:** Baseline sociodemographic variables and potential confounding vascular risk factors for the control cohort and the prevalent & incident AD cases (for details, see the Materials and Methods section).

|                                      | Control cohort<br>(n=6199) | Incident/prevalent<br>AD cases (n=226) | Incident<br>AD cases (n=131) |
|--------------------------------------|----------------------------|----------------------------------------|------------------------------|
| Age (years)                          | 73.8 ± 5.3                 | 79.6 ± 6.1                             | 78.9 ± 5.7                   |
| % women                              | 61.6%                      | 64.8%                                  | 60.0%                        |
| ε4 allele frequency                  | 10.6%                      | 24.7%                                  | 19.6%                        |
| Educational level                    | 45.7%                      | 69.7%                                  | 55.6%                        |
| Body mass index (kg/m <sup>2</sup> ) | 25.7 ± 4.0                 | 25.0 ± 4.9                             | 24.5 ± 4.2                   |
| Hypertension                         | 77.0%                      | 86.8%                                  | 79.3%                        |
| History of vascular disease          | 8.6%                       | 10.0%                                  | 13.3%                        |
| Diabetes mellitus                    | 9.1%                       | 15.6%                                  | 14.2%                        |

Low Educational level (primary education without a diploma, primary education with a diploma, secondary education without a baccalaureate degree).

**Table S16** Methodology for genotyping: **(A)** Listing of primers and enzymes used for RFLP. **(B)** TaqMan: primers and probes (assay on demand). **(C)** TaqMan SNP genotyping assay: design already available.

**A**

| SNP          |         | Primer                      | Enzyme    |
|--------------|---------|-----------------------------|-----------|
| (rs1157505)  | Forward | 5'-gctcactgcagcctccaatt-3'  | Nla III   |
|              | Reverse | 5'-ttgtcttgagtaagcattagg-3' |           |
| (rs1891385)  | Forward | 5'-tcaagtctggtgttgatg-3'    | HpyCH4V   |
|              | Reverse | 5'-aaagaggattagatgcac-3'    |           |
| (rs10975511) | Forward | 5'-aaatggtgcactgtattgg-3'   | Mse I     |
|              | Reverse | 5'-atttagttagtctaagtgt-3'   |           |
| (rs7035413)  | Forward | 5'-gaagcaggagaaaggaga-3'    | HpyCH4III |
|              | Reverse | 5'-ctttggttggttggtcca-3'    |           |
| (rs11792633) | Forward | 5'-acatggcataaggaaagg-3'    | Pae I     |
|              | Reverse | 5'-tcaacactgtacaatggtg-3'   |           |
| (rs7044343)  | Forward | 5'-ttacatgcagacaggaaagc-3'  | BspCNI    |
|              | Reverse | 5'-agaggcactgataagtagag-3'  |           |
| (rs1048274)  | Forward | 5'-atgaaacctgtgagtctg-3'    | Ssp I     |
|              | Reverse | 5'-agatgcagtatacagagg-3'    |           |
| (rs8172)     | Forward | 5'-ctttgttcattgttctgtc-3'   | Rsa I     |
|              | Reverse | 5'-tcgtgcacatggaccctaga-3'  |           |

**B**

| SNP          |         | Primers (5'-3') <sup>a</sup> | Probes <sup>b</sup>                 |
|--------------|---------|------------------------------|-------------------------------------|
| (rs992969)   | Forward | tgctttcttctcggactgg          | FAM-accatttcaatt <b>A</b> acctatcac |
|              | Reverse | agcagtcagaagcaagaacca        | VIC-catttcaatt <b>G</b> acctatcac   |
| (rs16924144) | Forward | ctgcacgtgtggtggcattat        | FAM-catatggctcttga <b>G</b> taag    |
|              | Reverse | accaccacatactgacaattgtgat    | VIC-tggctcttga <b>A</b> taag        |
| (rs16924159) | Forward | ctcaaagtatgtgagcatggga       | FAM-cacactaaaact <b>A</b> cagagcc   |
|              | Reverse | gactttccagctggcctgt          | VIC-cactaaaact <b>G</b> cagagcc     |
| (rs16924161) | Forward | ccctaataatcagattctggcttgc    | FAM-caaacgctc <b>G</b> cataggt      |
|              | Reverse | ggatatgattgtctcccttagaagtgaa | VIC-caaacgctc <b>A</b> cataggt      |

<sup>a</sup>F, forward primer, R reverse primer.

<sup>b</sup> Allelic changes in the probes are shown in boldface.

**C**

| SNP          | Reference     |
|--------------|---------------|
| (rs7848215)  | C_31940459_20 |
| (rs996029)   | C_3022646_10  |
| (rs10815398) | C_31940348_20 |

**Figure S1 (A)** Location of the 15 SNPs studied in *IL-33*. **(B)** Linkage Disequilibrium between these sixteen polymorphisms using the Haploview software.

**A**

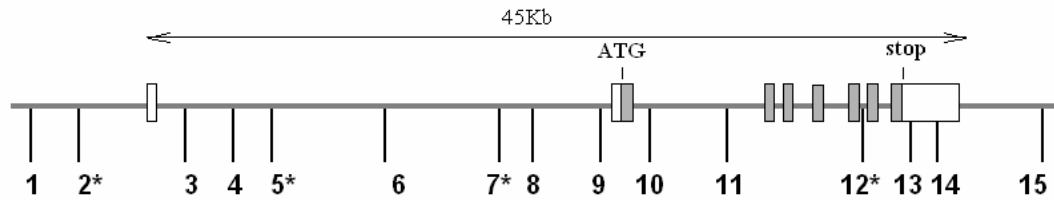

\*TagSNPs selected in HapMap database

**B**

| SNPs           |               | D'          |      |      |      |                         |      |      |      |      |      |             |             |      |      |      |
|----------------|---------------|-------------|------|------|------|-------------------------|------|------|------|------|------|-------------|-------------|------|------|------|
|                |               | 1           | 2*   | 3    | 4    | 5*                      | 6    | 7*   | 8    | 9    | 10   | 11          | 12*         | 13   | 14   | 15   |
| r <sup>2</sup> | 1 rs992969    |             | 1    | 0.71 | 1    | 0.88                    | 0.93 | 0.83 | 0.43 | 0.05 | 0.54 | 0.83        | 0.82        | 0.82 | 0.48 | 0.87 |
|                | 2* rs7848215  | <b>0.97</b> |      | 0.67 | 1    | 0.87                    | 1    | 0.82 | 0.48 | 0.13 | 0.57 | 0.81        | 0.82        | 0.81 | 0.62 | 0.86 |
|                | 3 rs1157505   | 0.06        | 0.06 |      | 0.42 | 0.63                    | 1    | 0.52 | 1    | 0.92 | 0.15 | 0.65        | 0.63        | 0.68 | 1    | 0.68 |
|                | 4 rs1891385   | 0.05        | 0.05 | 0.01 |      | 1                       | 1    | 1    | 1    | 1    | 1    | 0.79        | 1           | 0.90 | 1    | 1    |
|                | 5* rs16924144 | 0.14        | 0.14 | 0.26 | 0.07 |                         | 1    | 0.97 | 1    | 0.96 | 0.79 | 0.38        | 0.23        | 0.34 | 1    | 0.22 |
|                | 6 rs996029    | 0.01        | 0.02 | 0.02 | 0.01 | 0.03                    |      | 1    | 0.19 | 1    | 0.93 | 0.78        | 1           | 1    | 0.93 | 1    |
|                | 7* rs16924159 | 0.11        | 0.10 | 0.18 | 0.07 | <b>0.89<sup>a</sup></b> | 0.02 |      | 1    | 1    | 0.91 | 0.33        | 0.16        | 0.26 | 1    | 0.14 |
|                | 8 rs16924161  | 0.01        | 0.01 | 0.05 | 0.02 | 0.09                    | 0.01 | 0.08 |      | 0.93 | 1    | 1           | 1           | 1    | 0.02 | 1    |
|                | 9 rs10975511  | 0           | 0    | 0.11 | 0.05 | 0.20                    | 0.13 | 0.19 | 0.37 |      | 1    | 0.77        | 0.36        | 0.80 | 0.88 | 0.30 |
|                | 10 rs7035413  | 0.25        | 0.29 | 0    | 0.05 | 0.10                    | 0.01 | 0.11 | 0.05 | 0.12 |      | 0.78        | 0.95        | 0.92 | 0.21 | 0.94 |
|                | 11 rs11792633 | 0.14        | 0.13 | 0.27 | 0.17 | 0.13                    | 0.02 | 0.09 | 0.09 | 0.13 | 0.10 |             | 0.91        | 0.93 | 0.40 | 0.93 |
|                | 12* rs7044343 | 0.17        | 0.17 | 0.19 | 0.21 | 0.04                    | 0.07 | 0.02 | 0.11 | 0.04 | 0.19 | 0.64        |             | 1    | 1    | 1    |
|                | 13 rs1048274  | 0.12        | 0.12 | 0.31 | 0.23 | 0.11                    | 0.03 | 0.06 | 0.08 | 0.13 | 0.13 | <b>0.81</b> | 0.74        |      | 0.50 | 1    |
|                | 14 rs8172     | 0.01        | 0.01 | 0.03 | 0.01 | 0.05                    | 0.47 | 0.04 | 0    | 0.18 | 0    | 0.01        | 0.13        | 0.01 |      | 1    |
|                | 15 rs10815398 | 0.19        | 0.19 | 0.23 | 0.21 | 0.03                    | 0.07 | 0.01 | 0.11 | 0.02 | 0.19 | 0.67        | <b>0.97</b> | 0.75 | 0.13 |      |

\*TagSNPs selected in HapMap database

Bold r<sup>2</sup>>0.8

<sup>a</sup> in the Hapmap database, the r<sup>2</sup> between these two polymorphisms was of 0.74. However, we observed in both French and American control populations a r<sup>2</sup> of 0.89 and 0.86, respectively.



**Figure S2** Overexpression of IL-33 in the COS-7 cell line cotransfected with APP<sup>695wt</sup> and IL-33 expression vectors. **(A)** Representative experiment of APP metabolism variations following transfection following IL-33 and APP<sup>695wt</sup> cDNA transfection; **(B)** Representative experiment of A $\beta$ <sub>40</sub> secretion following transfection of the IL-33 expression vector; **(C)** Mean variations of the A $\beta$ <sub>40</sub> secretions from three independent experimentations in duplicates. **(D)** IL-33 accumulates in nucleus (colocalisation with dense regions of DAPI staining, indicating association with heterochromatin). No signal was detected using an empty vector (Mock) (Data not shown).

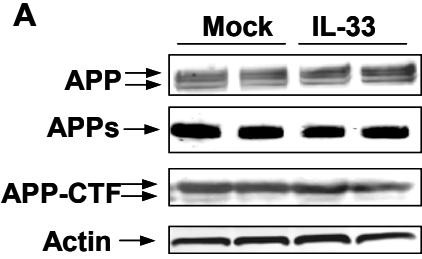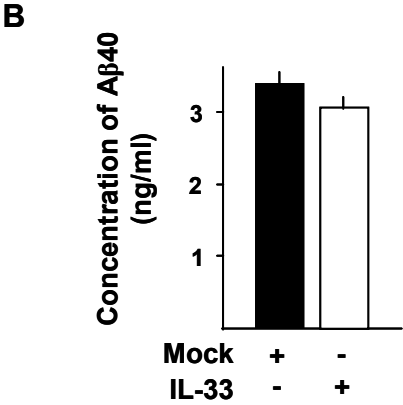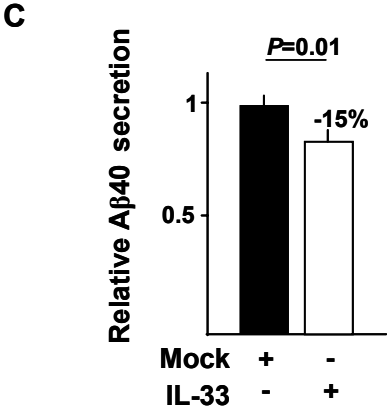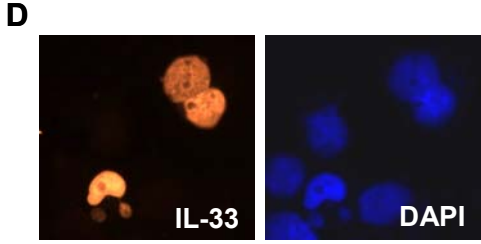

**Figure S3** Integrated strategy for the characterization of new AD genetic determinants.

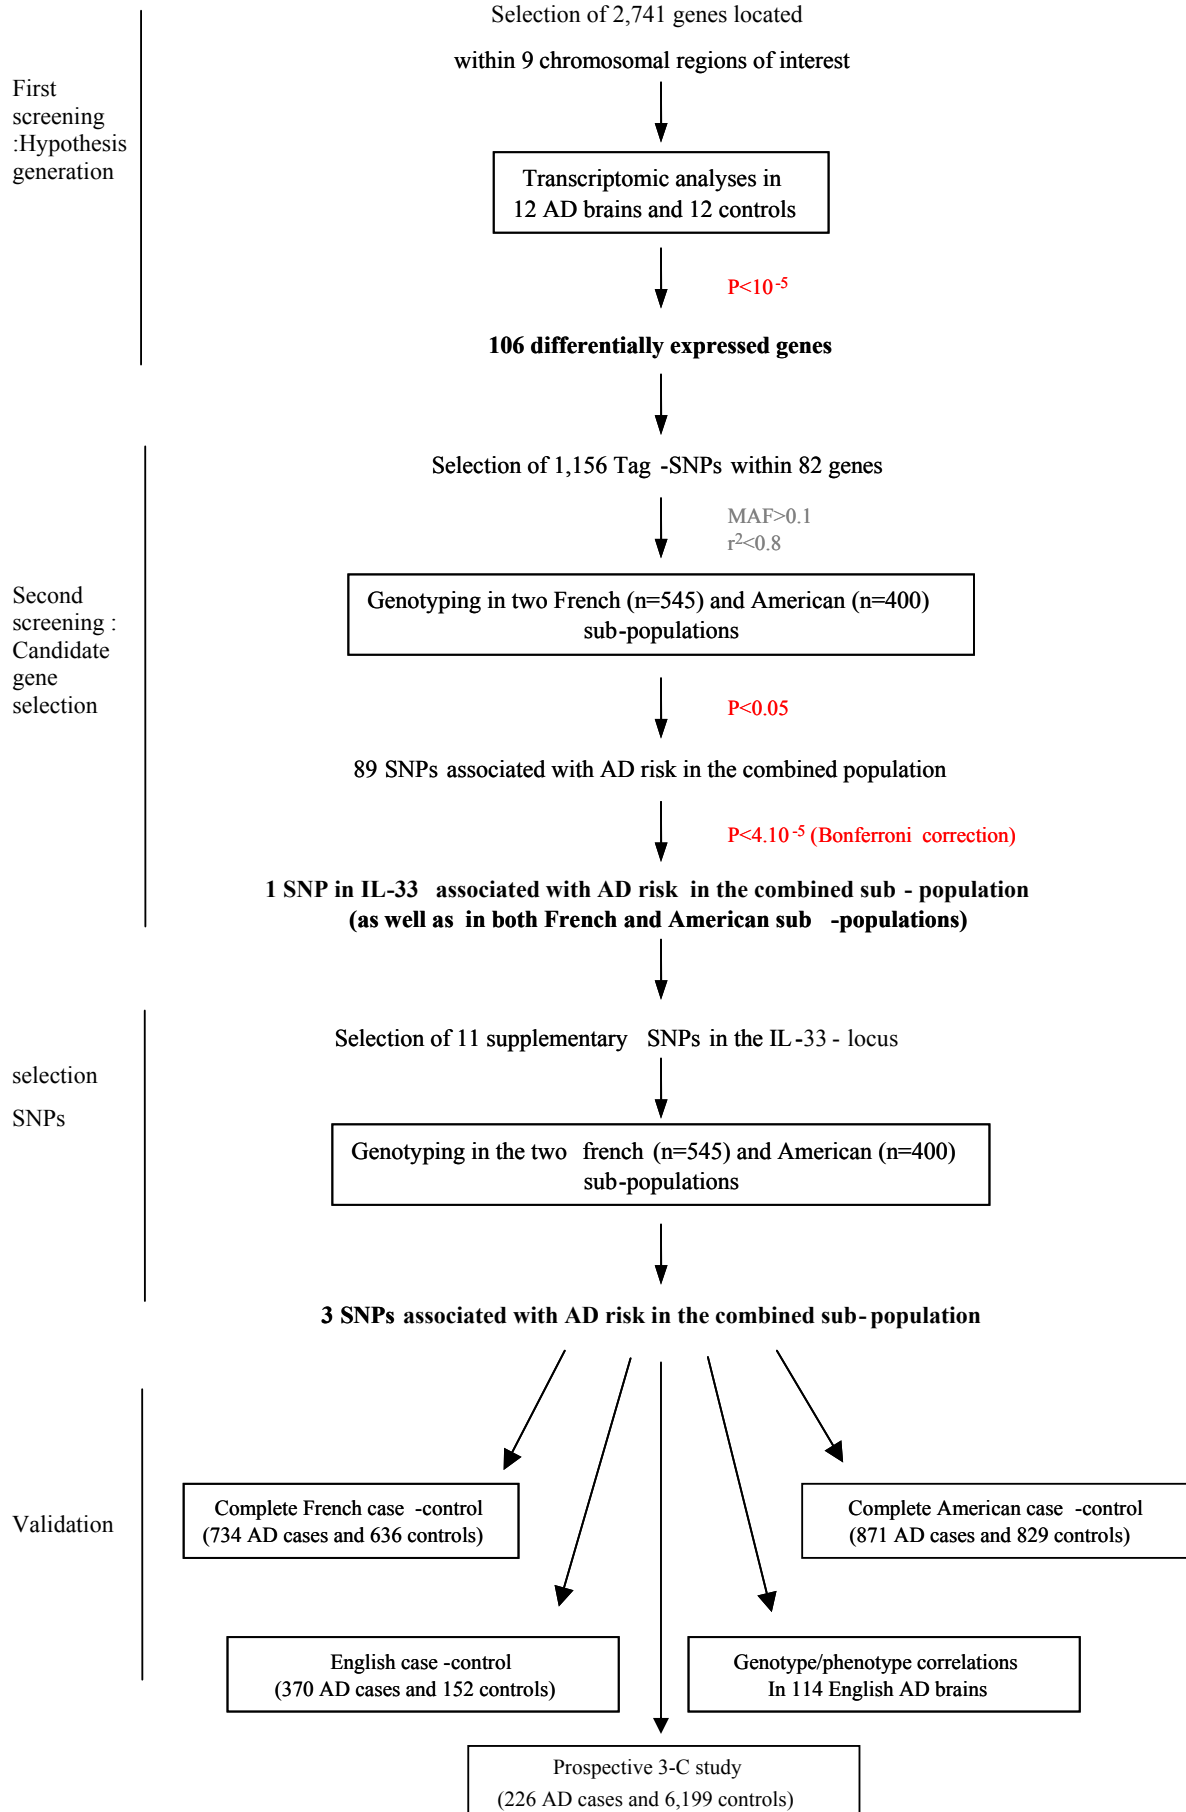

Supplement: NIHMS191799-supplement-Supplementray_Data.pdf [file NIHMS191799-supplement-Supplementray_Data.pdf]
